# Supplementary material
Source: PubMed Central journal article supplement (PMC1838565)
Supplement: pnas_0606005103_10.pdf [file pnas_0606005103_10.pdf]

**Table 2. Parameters of exponentially truncated power law degree distribution**

|         | $A$           | $\lambda$     | $k_c$       |
|---------|---------------|---------------|-------------|
| Resting |               |               |             |
| 1       | $0.8 \pm 0.2$ | $1.5 \pm 0.4$ | $8 \pm 4$   |
| 2       | $0.9 \pm 0.3$ | $1.6 \pm 0.5$ | $5 \pm 3$   |
| 3       | $0.9 \pm 0.3$ | $1.5 \pm 0.5$ | $8 \pm 15$  |
| 4       | $0.9 \pm 0.3$ | $1.6 \pm 0.6$ | $6 \pm 4$   |
| 5       | $0.8 \pm 0.2$ | $1.6 \pm 0.4$ | $5 \pm 2$   |
| 6       | $1.0 \pm 0.2$ | $1.4 \pm 0.3$ | $8 \pm 6$   |
| Tapping |               |               |             |
| 1       | $0.9 \pm 0.1$ | $1.4 \pm 0.2$ | $9 \pm 4$   |
| 2       | $0.8 \pm 0.2$ | $1.7 \pm 0.4$ | $5 \pm 1$   |
| 3       | $0.8 \pm 0.3$ | $1.7 \pm 0.5$ | $5 \pm 2$   |
| 4       | $0.8 \pm 0.3$ | $1.7 \pm 0.5$ | $6 \pm 4$   |
| 5       | $0.9 \pm 0.2$ | $1.5 \pm 0.5$ | $10 \pm 14$ |
| 6       | $1.0 \pm 0.1$ | $1.2 \pm 0.3$ | $14 \pm 20$ |

The degree distribution of all networks at all frequency bands and both behavioral states was best described by a truncated power law, given in the form  $P(k) \sim Ak^{\lambda-1}e^{k/k_c}$ , where  $A$  is the coefficient,  $\lambda$  describes the power law, and  $k_c$  is the exponential parameter. These three parameters are given here along with their standard deviation and show a large scaling regime as depicted in the bottom row of Fig. 1.
