# Supplementary material
Source: PubMed Central journal article supplement (PMC1838565)

# Fit of Degree Distribution

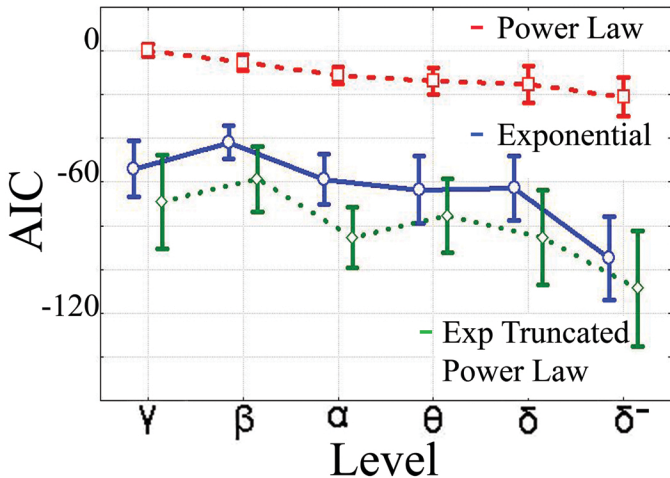

Supplement: pnas_0606005103_1.pdf [file pnas_0606005103_1.pdf]

Resting

Tapping

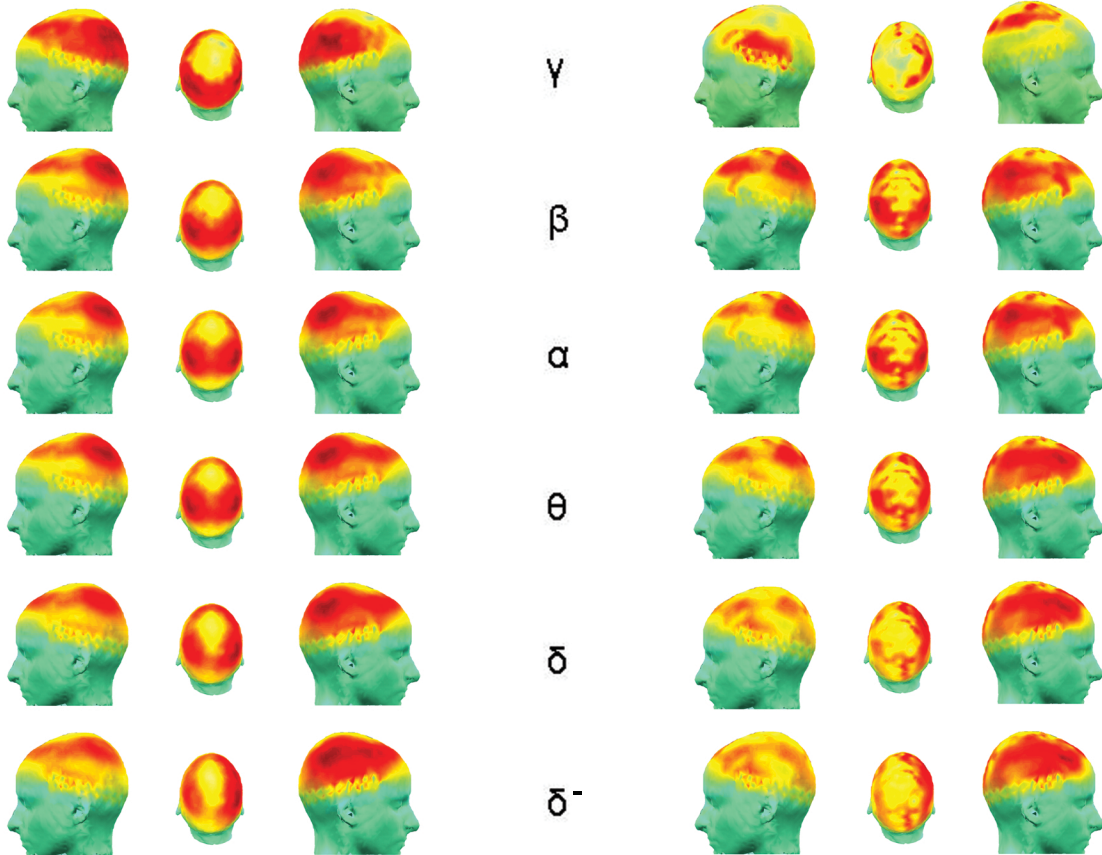

Degree of Hubs

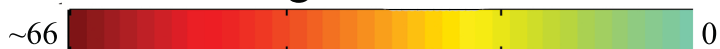

Supplement: pnas_0606005103_2.pdf [file pnas_0606005103_2.pdf]

- Provincial
- Connector
- Kinless

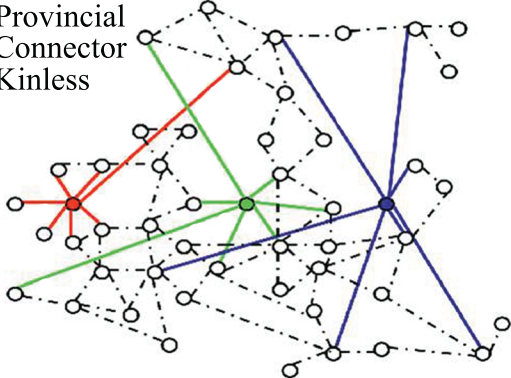

Supplement: pnas_0606005103_3.pdf [file pnas_0606005103_3.pdf]

Resting

Tapping

Types of Hubs

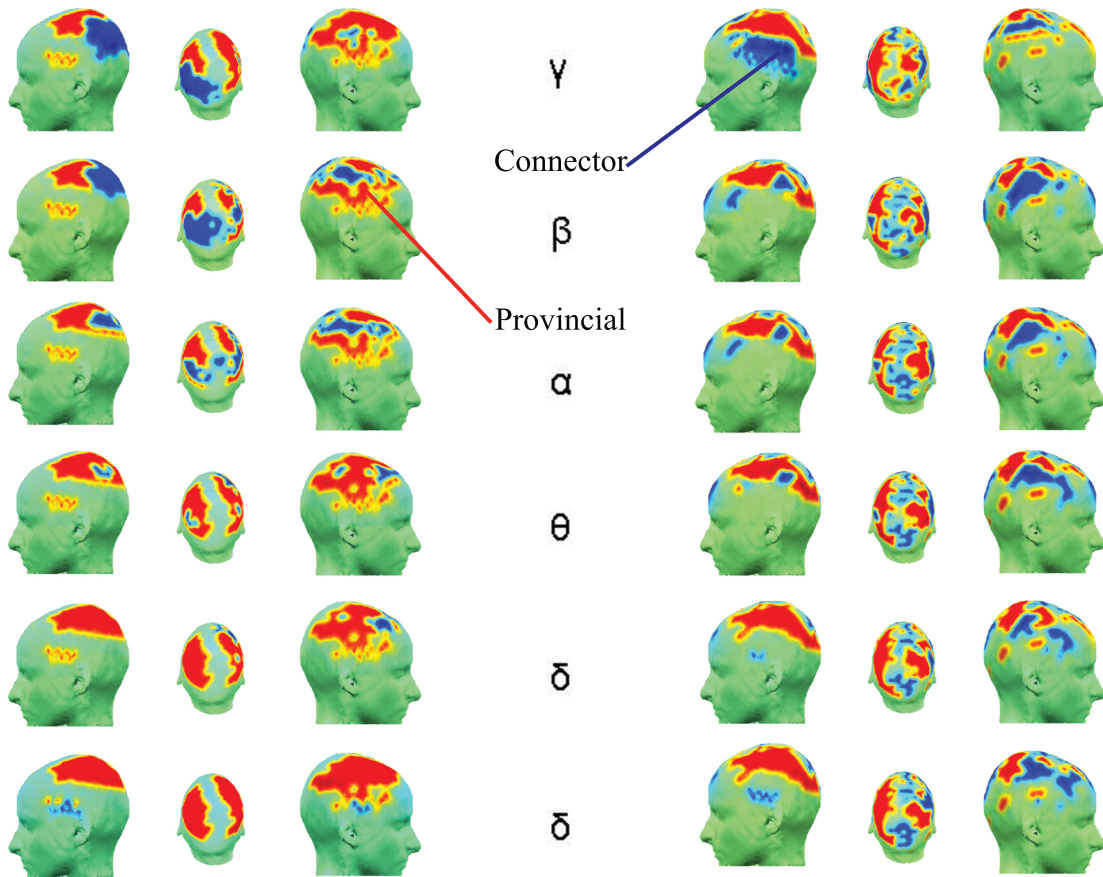

Supplement: pnas_0606005103_4.pdf [file pnas_0606005103_4.pdf]

Resting

Tapping

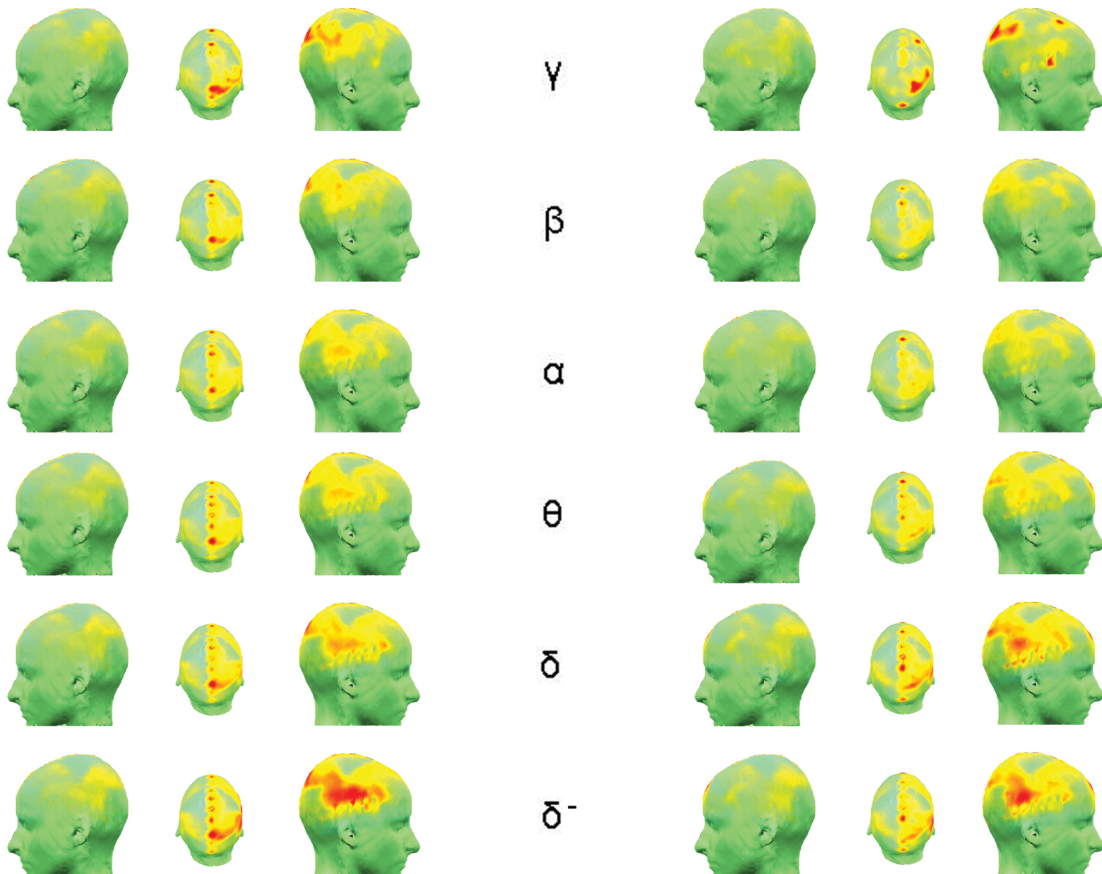

Betweenness

.16

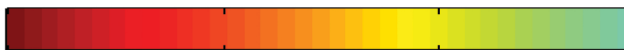

0

Supplement: pnas_0606005103_5.pdf [file pnas_0606005103_5.pdf]

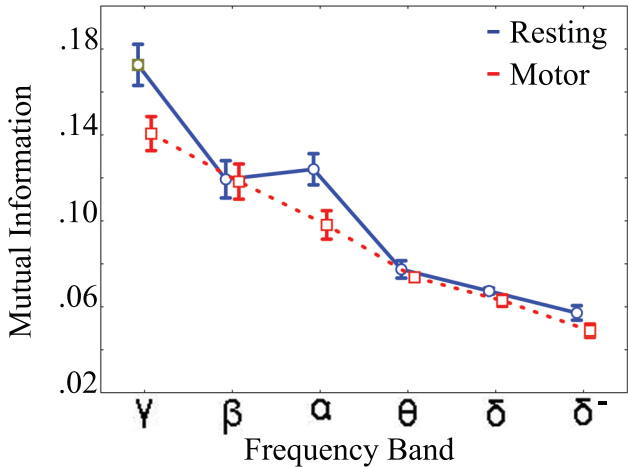

Supplement: pnas_0606005103_7.pdf [file pnas_0606005103_7.pdf]

# Correlation of Graph Theory Parameters

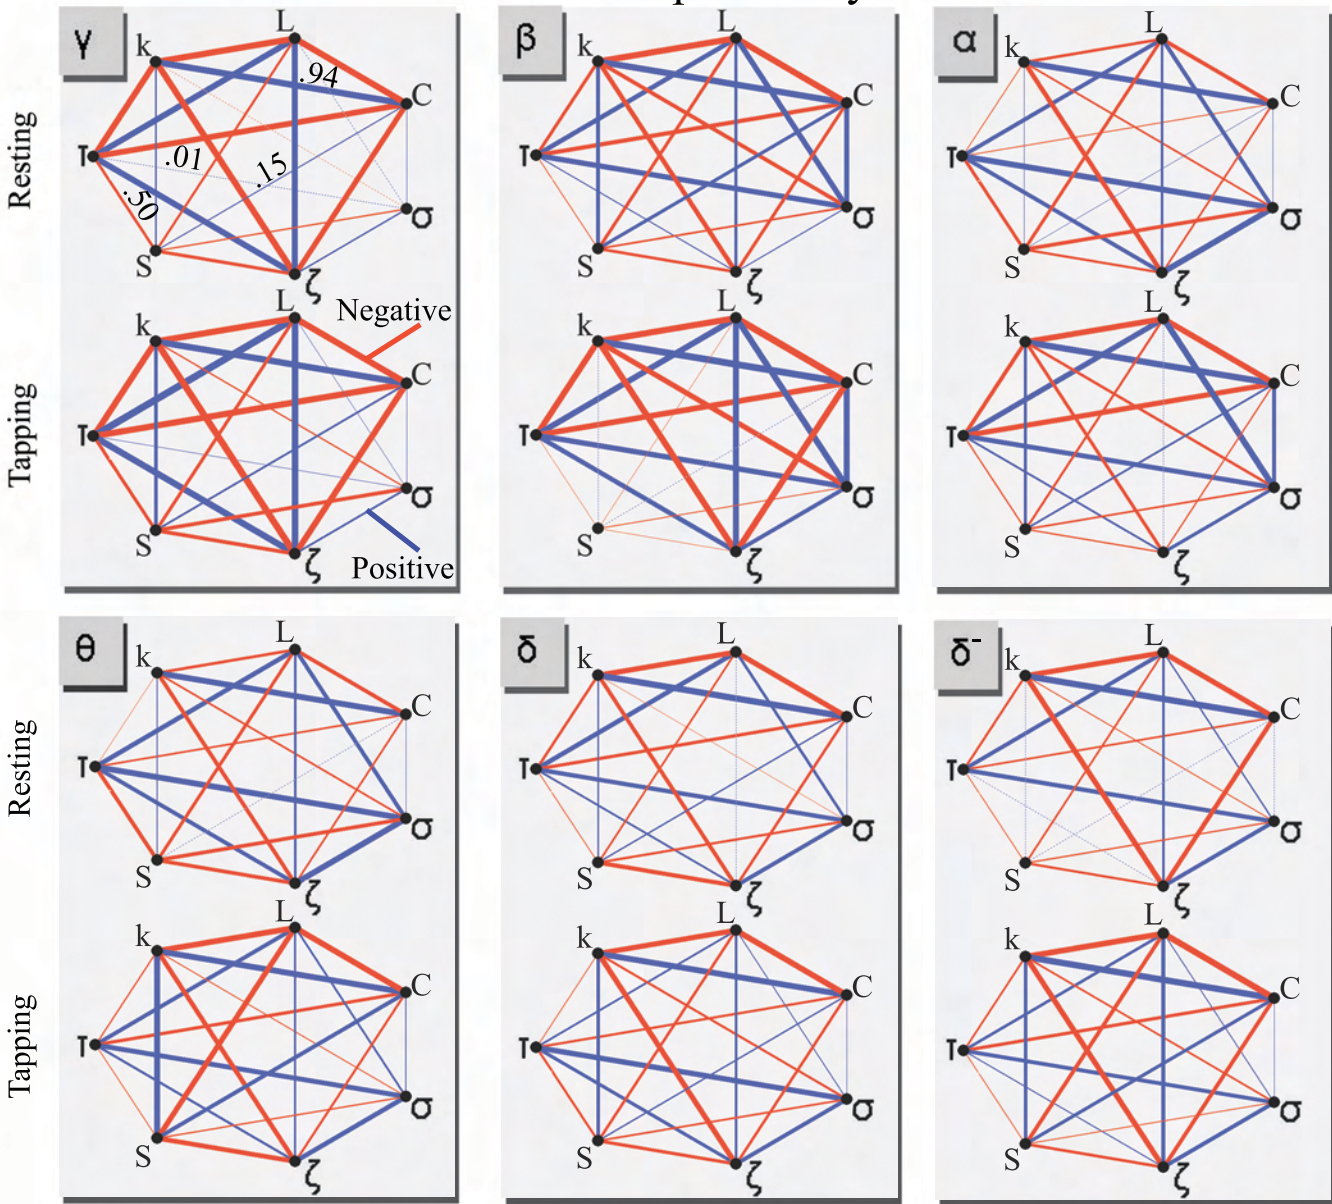

Supplement: pnas_0606005103_8.pdf [file pnas_0606005103_8.pdf]

Log (Number of Nodes)

Resting

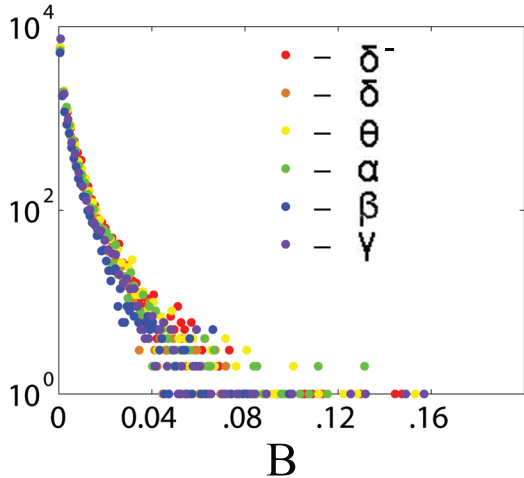

Motor

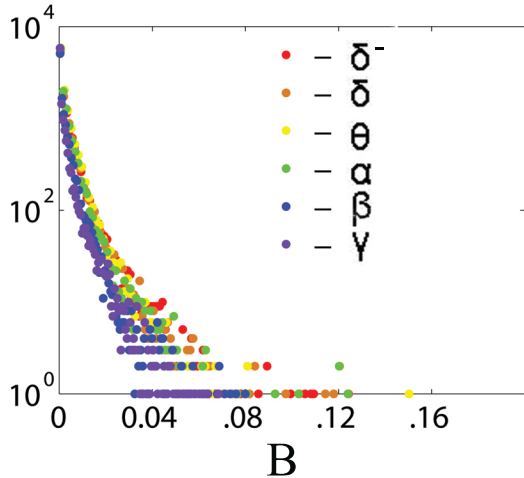

Supplement: pnas_0606005103_9.pdf [file pnas_0606005103_9.pdf]
